# Supplementary material for: A new class of radiopeptides for PET imaging of neuromedin-B receptor:68Ga-ranatensin analogs
Source: Royal Society of Chemistry journal article supplement (doi:10.1039/c6md00131a), 2016-01-01
Supplement: c6md00131a4.pdf [file c6md00131a4.pdf]

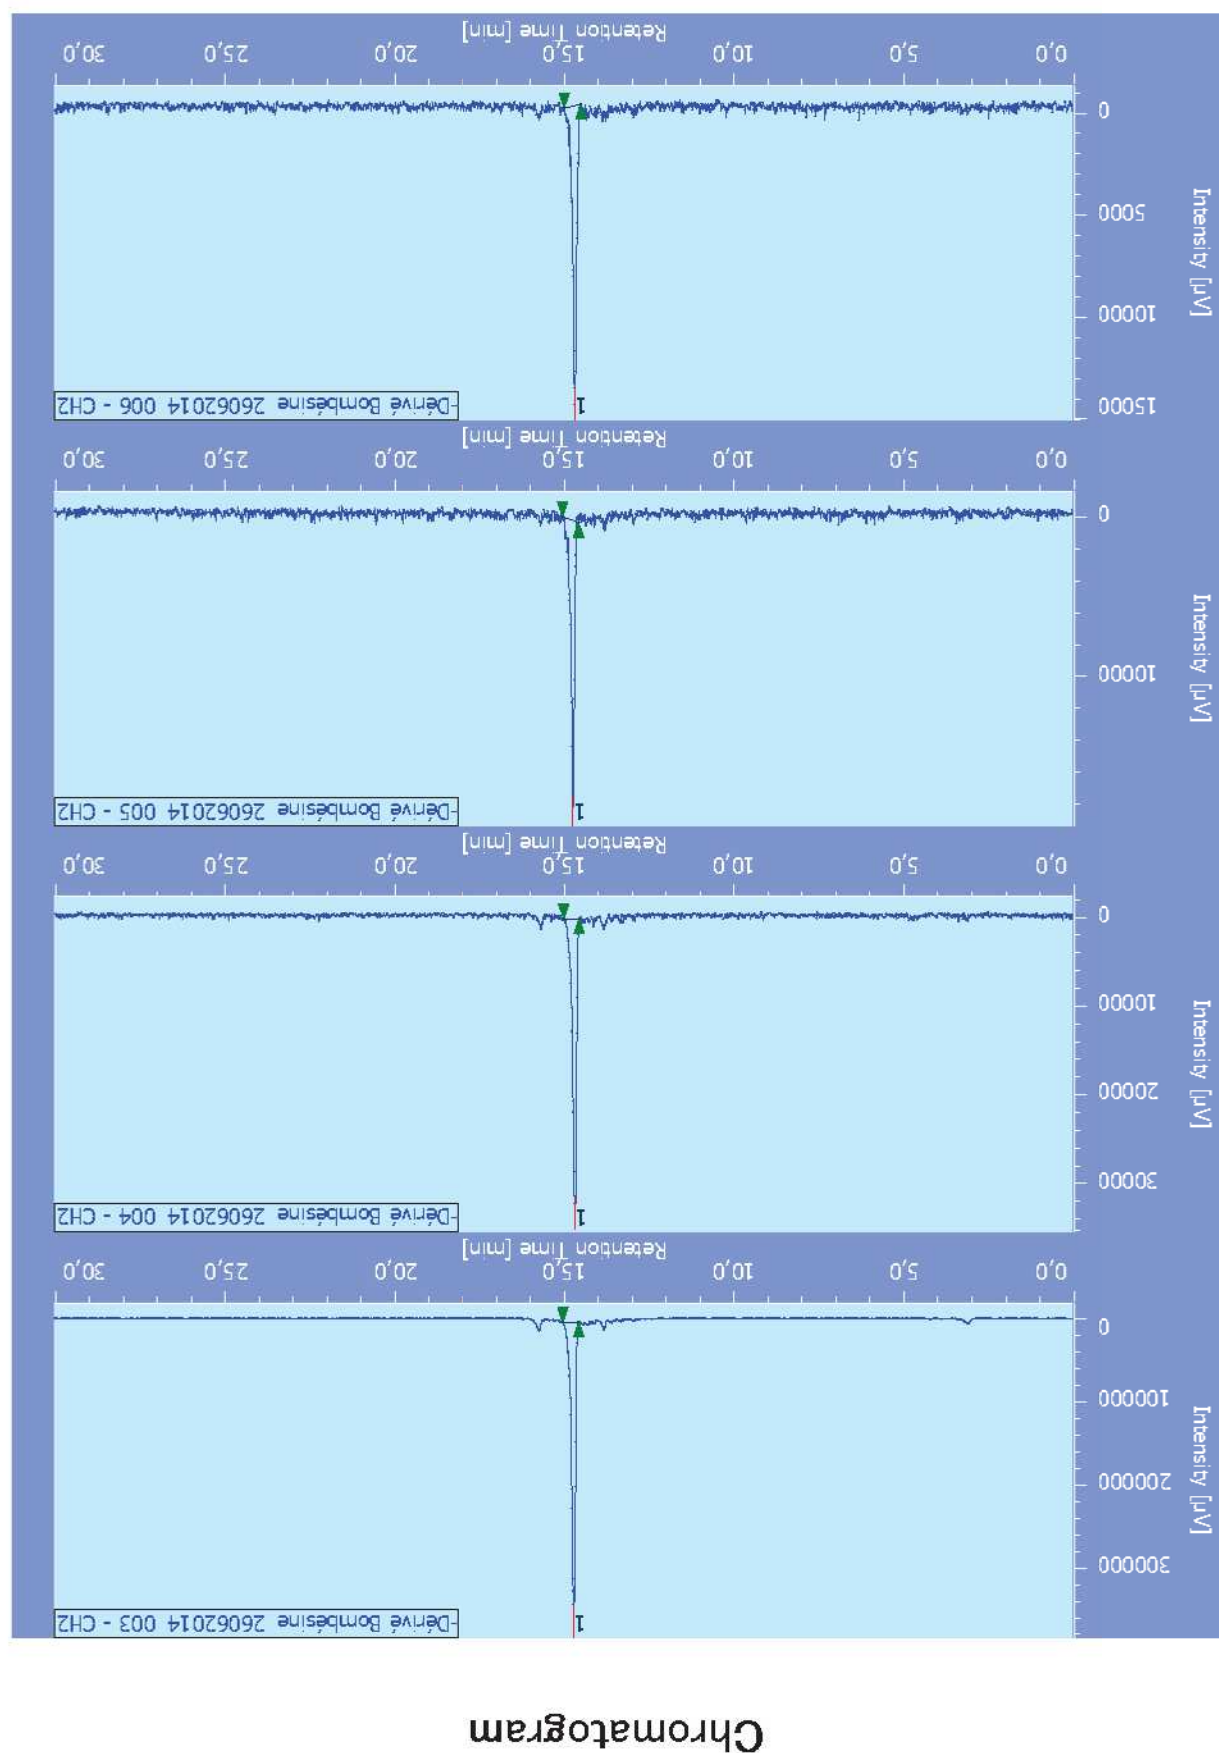

Channel & Peak Information Table

Dérivé Bombésine\_26062014\_003-CH2

RV-15 CQ

| # | Peak Name | CH | tR [min] | Area [µV·sec] | Height [µV] | Area%   | Height% | Quantity | NTP   | Resolution | Symmetry Factor | Warning |
|---|-----------|----|----------|---------------|-------------|---------|---------|----------|-------|------------|-----------------|---------|
| 1 | Unknown   | 2  | 14.71    | 2893751       | 361228      | 100.000 | 100.000 | N/A      | 87252 | N/A        | 1.419           | Warning |

Chromatogram Name

Dérivé Bombésine\_26062014\_004-CH2

RV-15 2min

| # | Peak Name | CH | tR [min] | Area [µV·sec] | Height [µV] | Area%   | Height% | Quantity | NTP   | Resolution | Symmetry Factor | Warning |
|---|-----------|----|----------|---------------|-------------|---------|---------|----------|-------|------------|-----------------|---------|
| 1 | Unknown   | 2  | 14.675   | 273152        | 33248       | 100.000 | 100.000 | N/A      | 74164 | N/A        | 1.652           | Warning |

Chromatogram Name

Dérivé Bombésine\_26062014\_005-CH2

RV-15 30min

| # | Peak Name | CH | tR [min] | Area [µV·sec] | Height [µV] | Area%   | Height% | Quantity | NTP    | Resolution | Symmetry Factor | Warning |
|---|-----------|----|----------|---------------|-------------|---------|---------|----------|--------|------------|-----------------|---------|
| 1 | Unknown   | 2  | 14.742   | 134192        | 18167       | 100.000 | 100.000 | N/A      | 120720 | N/A        | 1.542           | Warning |

Channel Name

CH2-RADIO

Sample Name

RV-15 45min

Chromatogram Name

Dérivé Bombésine\_26062014\_006-CH2

| # | Peak Name | CH | tR [min] | Area [µV·sec] | Height [µV] | Area%   | Height% | Quantity | NTP   | Resolution | Symmetry Factor | Warning |
|---|-----------|----|----------|---------------|-------------|---------|---------|----------|-------|------------|-----------------|---------|
| 1 | Unknown   | 2  | 14.663   | 122927        | 14644       | 100.000 | 100.000 | N/A      | 87807 | N/A        | 1.317           | Warning |

Channel Name

CH2-RADIO
