# Supplementary figures and images for: A new class of radiopeptides for PET imaging of neuromedin-B receptor:68Ga-ranatensin analogs
Source: Royal Society of Chemistry journal article supplement (doi:10.1039/c6md00131a), 2016-01-01

**A**

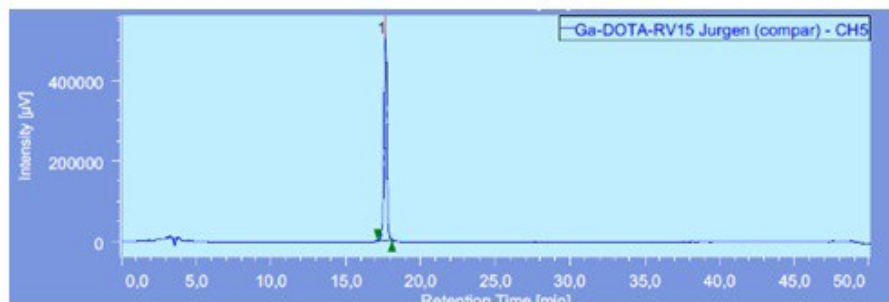

**B**

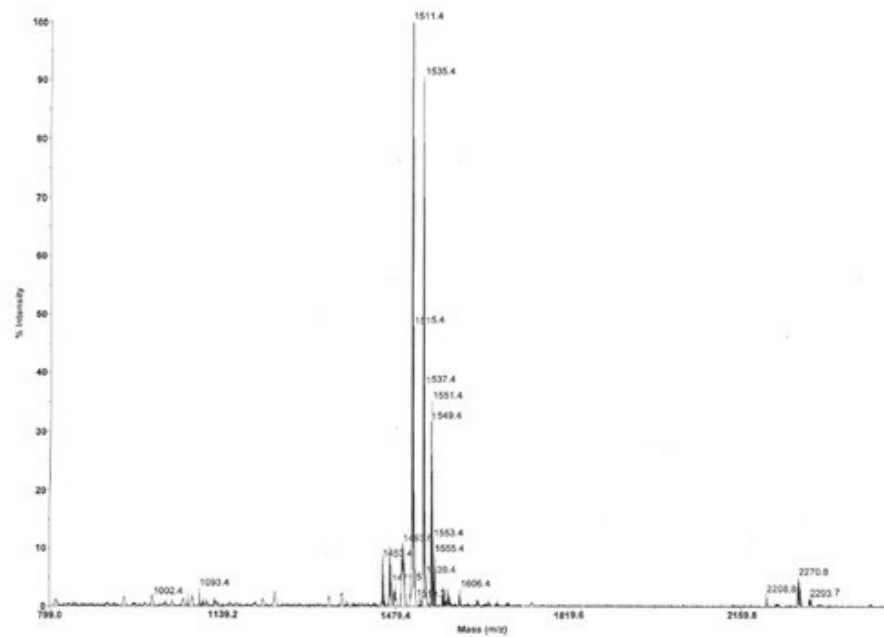

Supplement: c6md00131a3.pdf [file c6md00131a3.pdf]
